# Supplementary material
Source: PubMed Central journal article supplement (PMC6267930)
Supplement: NIHMS996152-supplement-Suppl__data.pdf [file NIHMS996152-supplement-Suppl__data.pdf]

**Cell Host & Microbe, Volume 23**

## **Supplemental Information**

### **The Monocot-Specific Receptor-like Kinase SDS2**

#### **Controls Cell Death and Immunity in Rice**

**Jiangbo Fan, Pengfei Bai, Yuese Ning, Jiyang Wang, Xuetao Shi, Yehui Xiong, Kai Zhang, Feng He, Chongyang Zhang, Ruyi Wang, Xiangzong Meng, Jinggeng Zhou, Mo Wang, Gautam Shirsekar, Chan Ho Park, Maria Bellizzi, Wende Liu, Jong-Seong Jeon, Ye Xia, Libo Shan, and Guo-Liang Wang**

## Supplemental Figures

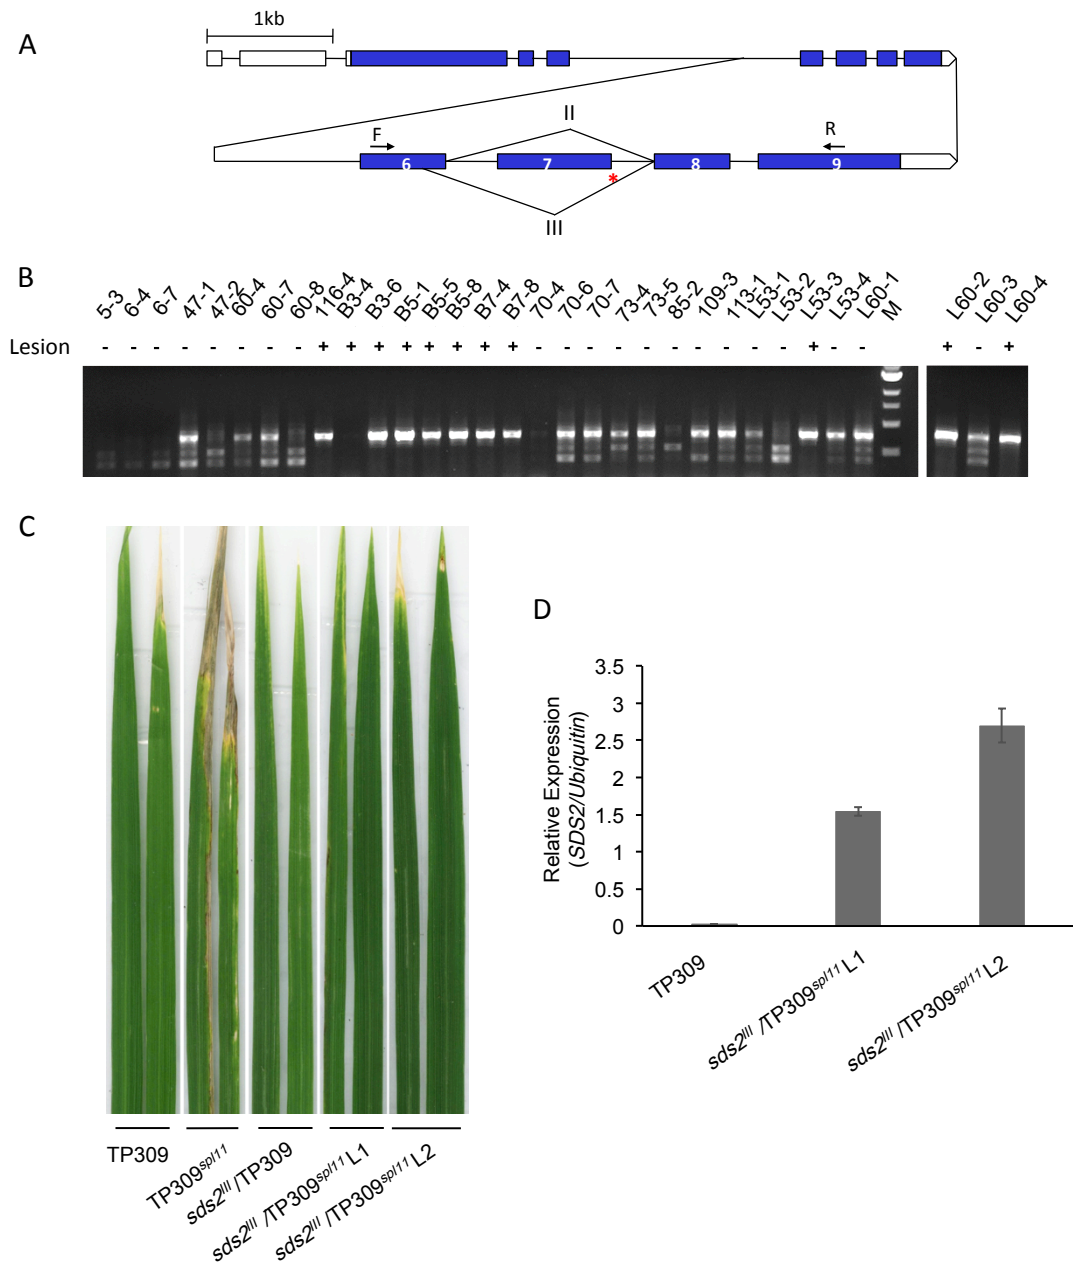

**Figure S1. Related to Figure 1: Characterization of the *sds2* Mutant.** (A) The *sds2* mutation leads to alternative splicing. Schema of the *SDS2* gene structure and alternative splicing. Boxes and lines indicate exons and introns, respectively. Blue boxes indicate coding regions. Red star shows the G/A transition. F and R indicate primers used for qRT-PCR amplification. II and III show the alternative splicing of Band II and Band III in Figure 1C. (B) Co-segregation assay of lesion suppression and *sds2* mutation. + and – indicate lesion positive and lesion negative plants, respectively. (C) Suppression of *spl11* lesion mimics by over-expression of *sds2<sup>III</sup>* in transgenic plants. (D) qRT-PCR analysis of the *sds2<sup>III</sup>* transgene transcript levels of *sds2<sup>III</sup>* transgenic plants compared to the wild-type TP309. Values are means  $\pm$  SD calculated from 3 technical repeats.

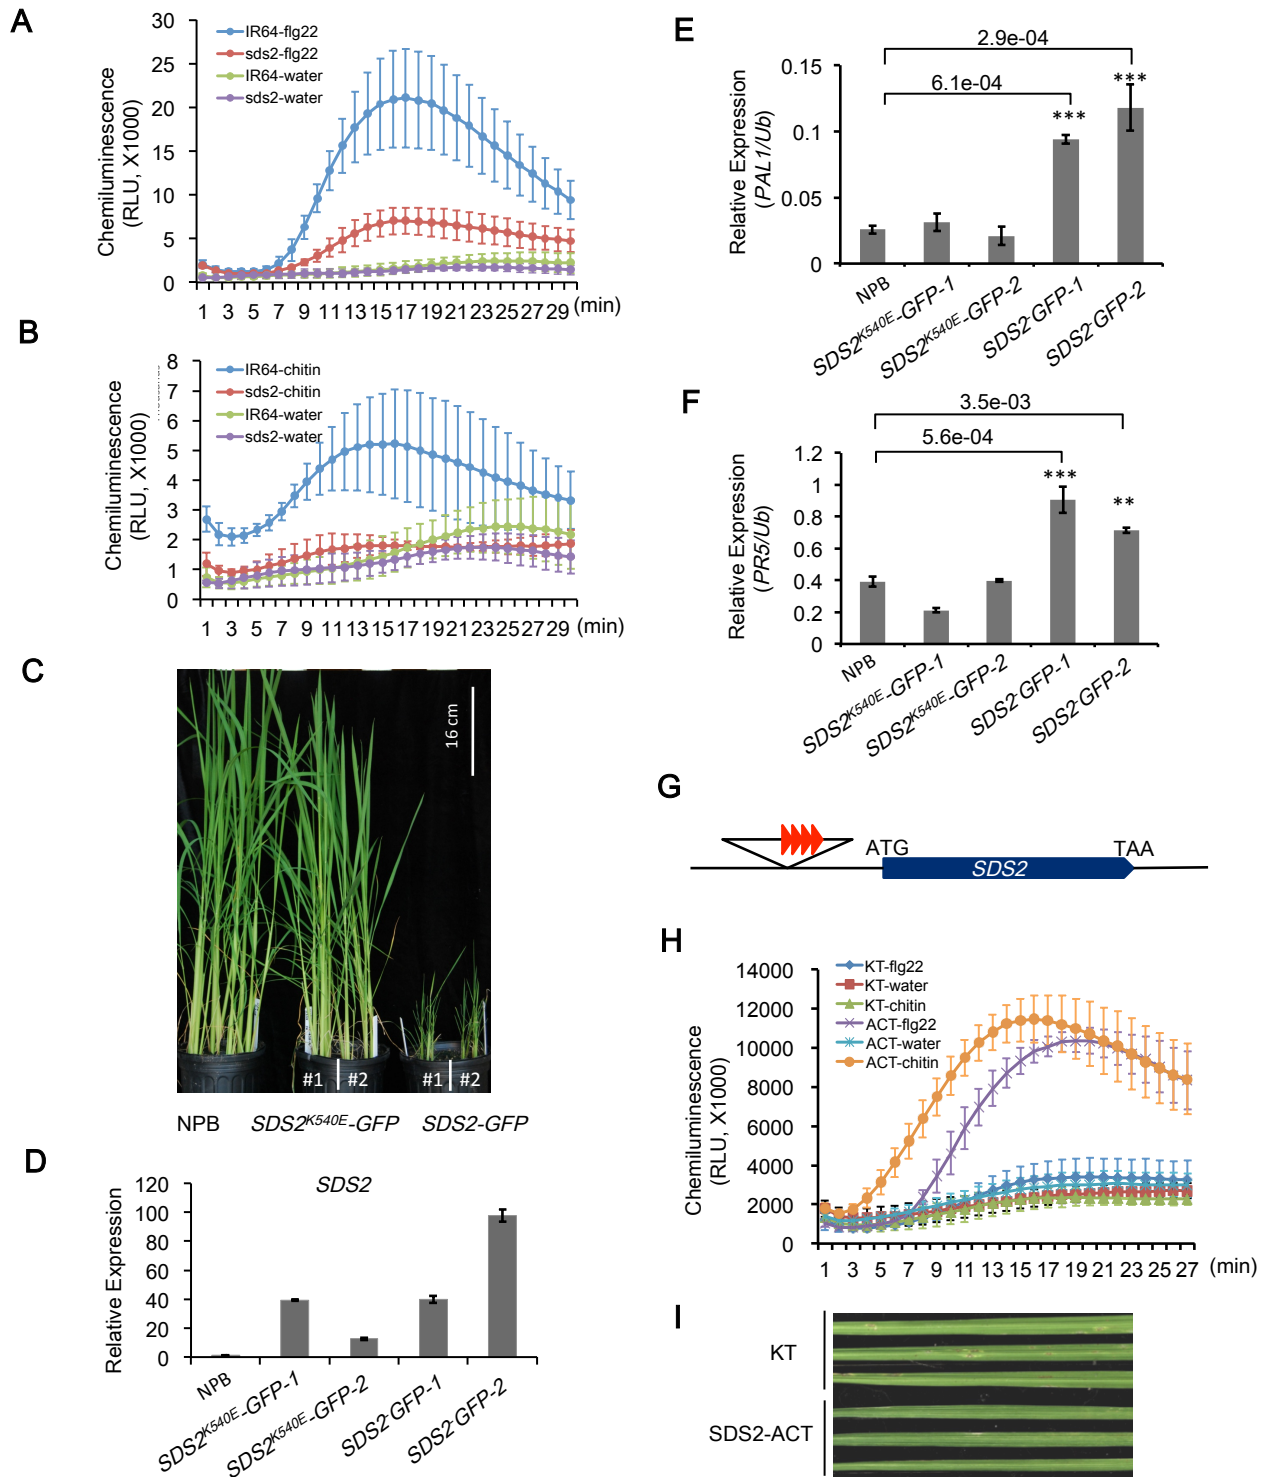

**Figure S2. Related to Figure 2: *SDS2* Positively Regulates Rice Immunity.** (A) and (B) ROS induction in *sds2* and IR64 plants. Leaf discs were treated with 100 $\mu$ M flg22 (A) and 10 $\mu$ g/ml chitin (B), respectively. ROS generation is monitored for 30 min. Bars indicate means of SD calculated from three technical repeats. (C) *SDS2-GFP* overexpression suppresses rice growth (2 months old). (D) qRT-PCR analysis of *SDS2-GFP* transgene expression levels. (E) and (F) PR genes *PAL1* (E) and *PR5* (F) expression in *SDS2-GFP* overexpression plants. Values are means  $\pm$  SD,  $n = 3$  (technical repeats). Asterisks represent significant difference determined by Student's  $t$  test (\*\*  $p < 0.01$ , \*\*\*  $p < 0.001$ ).  $p$  values are labeled. (G) Schematic representation of *SDS2-ACT* line. Start codon and stop codon are indicated. Red triangles indicate quadrupleCaMV 35S enhancers. (H) ROS induction in *SDS2-ACT* plants. KT and ACT indicate wild-type Kitaake and *SDS2-ACT* plants, respectively. ROS generation was monitored for 30 min. Bars indicate means of SD calculated from three technical repeats. (I) Spray-inoculated leaves of *SDS2-ACT* plants with blast isolate RO1-1 at 6 dpi. This inoculation was replicated twice with similar results.

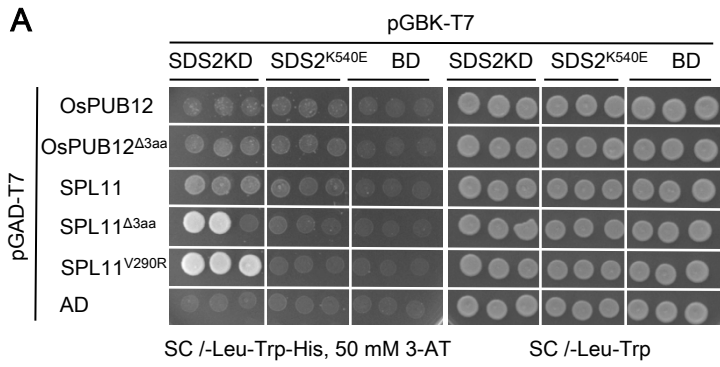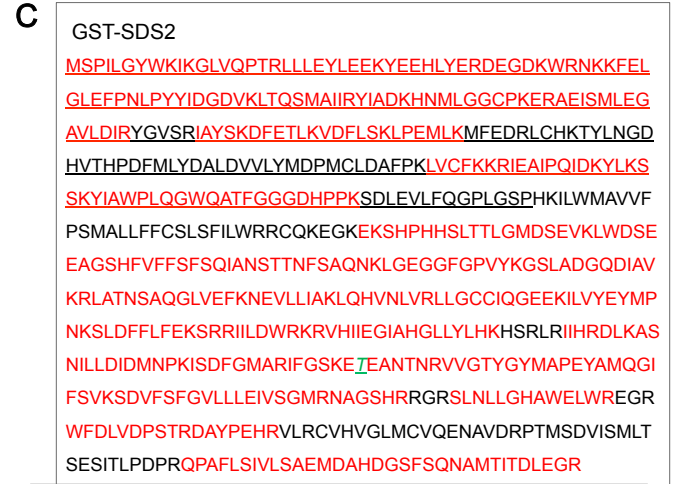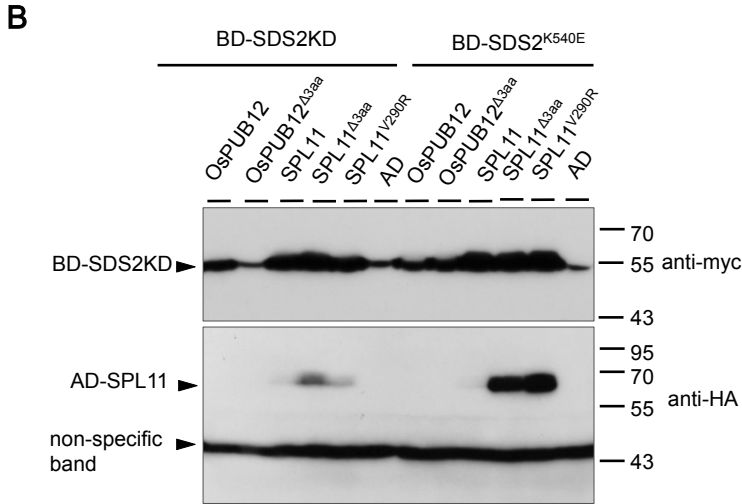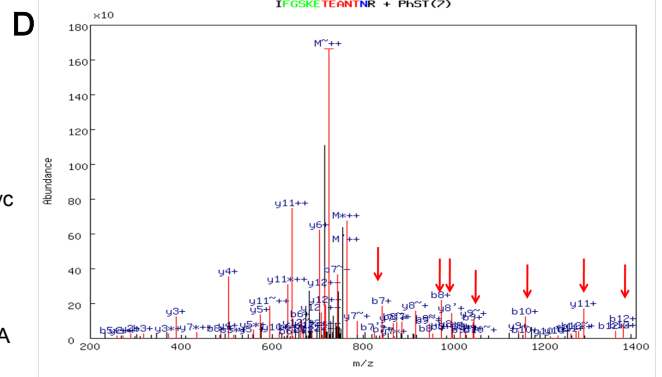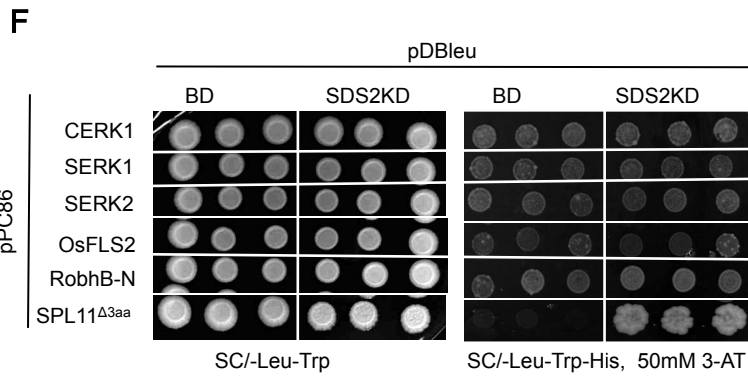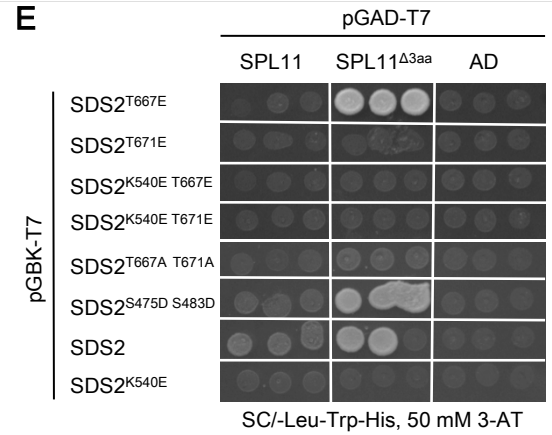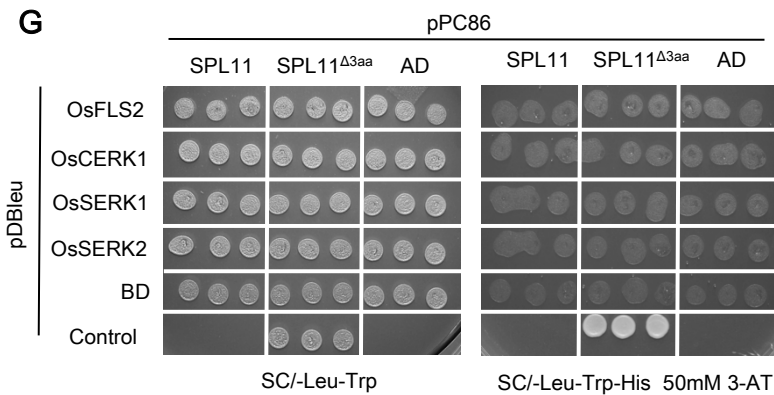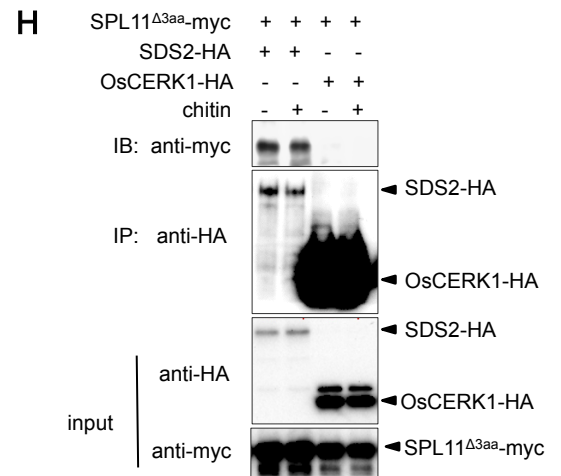

**Figure S3. Related to Figure 3: SDS2 Interacts with SPL11 but not with OsCERK1, OsSERK1 (OsBAK1), OsSERK2, OsFLS2 and OsRbohB.** (A) Detection of the SDS2-SPL11 interaction with the TaKaRa yeast two-hybrid system (pGBK-T7 and pGAD-T7). OsPUB12 and its mutant OsPUB12<sup>Δ3aa</sup> (C269 P270 K271 three amino acids deletion in the U-box domain) were used as the controls. (B) Detection of protein levels for Y2H assay. Anti-myc and anti-HA antibodies are applied to detect BD fusions and AD fusions in this Y2H system. Arrows indicate specified proteins. Molecular weights in kD are labeled on right. (C) Mass spectrum (MS) analysis of GST-SDS2 auto-phosphorylation sites. Red and black sequences indicate covered and uncovered peptides in the MS data. Green italic letter highlights the detected auto-phosphorylation sites. Underlined sequence is GST tag. (D) A representative plot of MS peptide peaks. Peptide is labeled on the top of the plot. Red arrows indicate phosphorylated peptides. (E) Removal of the auto-phosphorylation site (T667) and its potential alternative site (T671) abolishes the SDS2-SPL11 interaction. (F) SDS2 does not interact with rice OsCERK1, OsSERK1 (OsBAK1), OsSERK2, OsFLS2 and OsRbohB. These genes are constructed in pPC86 and SDS2 (intracellular domain) is in pDBleu. Co-transformants are grown on selection media to detect interaction. (G) No interaction between SPL11 and OsFLS2, OsCERK1 and OsSERK1/2. SPL11 and SPL11<sup>Δ3aa</sup> were fused with AD while candidate kinase genes were fused with BD. Co-transformants were grown on selection media to detect interactions. Positive control was intact GAL4 transformants. (H) Co-IP assay to show SPL11 interacts with SDS2 but not with OsCERK1 and the interaction is not affected by PAMP treatment. SDS2-HA and OsCERK1-HA are used as baits and SPL11<sup>Δ3aa</sup>-myc is used as prey. The assay is conducted with rice protoplasts. Protoplasts are treated with (+) or without (-) 5μg/ml chitin for 15 min.

**A**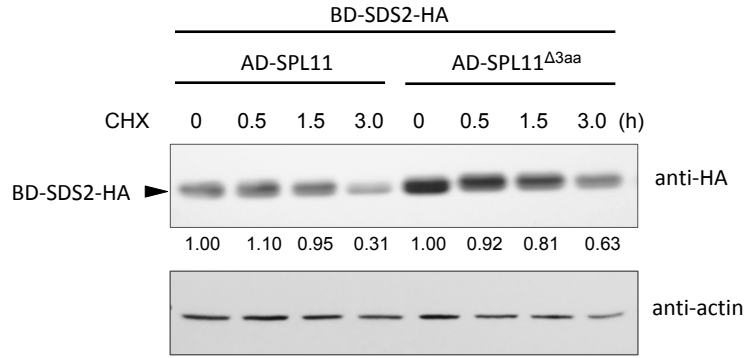**B**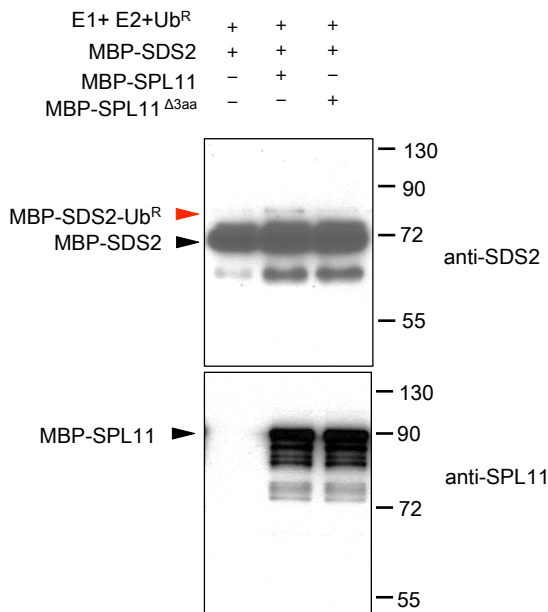**C**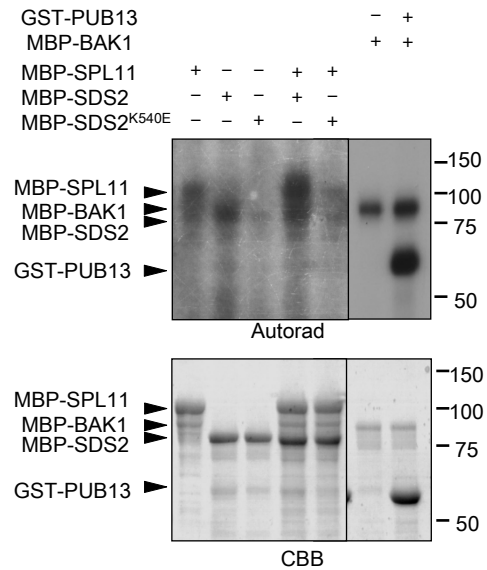**Figure S4. Related to Figure 4: SDS2 is ubiquitinated and degraded by SPL11 and phosphorylate the later.** (A)

Degradation of SDS2 by SPL11 in Yeast. SDS2 tagged with HA was constructed in pDBLau which is co-transformed into yeast with pPC86-SPL11/SPL11 $\Delta$ 3aa. SDS2-HA was detected by western blot. Actin was detected as loading control. Signal intensity is determined by ImageJ software. (B) *In vitro* ubiquitination assay of SDS2 by SPL11. Mutant ubiquitin (Ub<sup>R</sup>) (all the Lys were substituted to Arg) was used in this assay to block formation of poly-ubiquitin chain. – and + indicate absent or present of proteins labeled on the left. Black triangles indicate corresponding protein bands labeled on the left. Red arrow indicates the ubiquitinated SDS2 band. (C) Trans-phosphorylation of SPL11 by SDS2. The assay was performed using MBP-SDS2 and MBP-BAK1 (intracellular domain) as kinases and MBP-SPL11 and GST-PUB13-ARM (ARM domain of PUB13) as substrates in the presence of [ $\gamma$ -<sup>32</sup>P] ATP. Phosphorylation is visualized by autoradiography (top panel). Loading are shown by CBB staining (bottom panel). – and + indicate absent or present of proteins labeled on the left. Molecular weights are labeled on the right. Black triangles indicate specific protein.

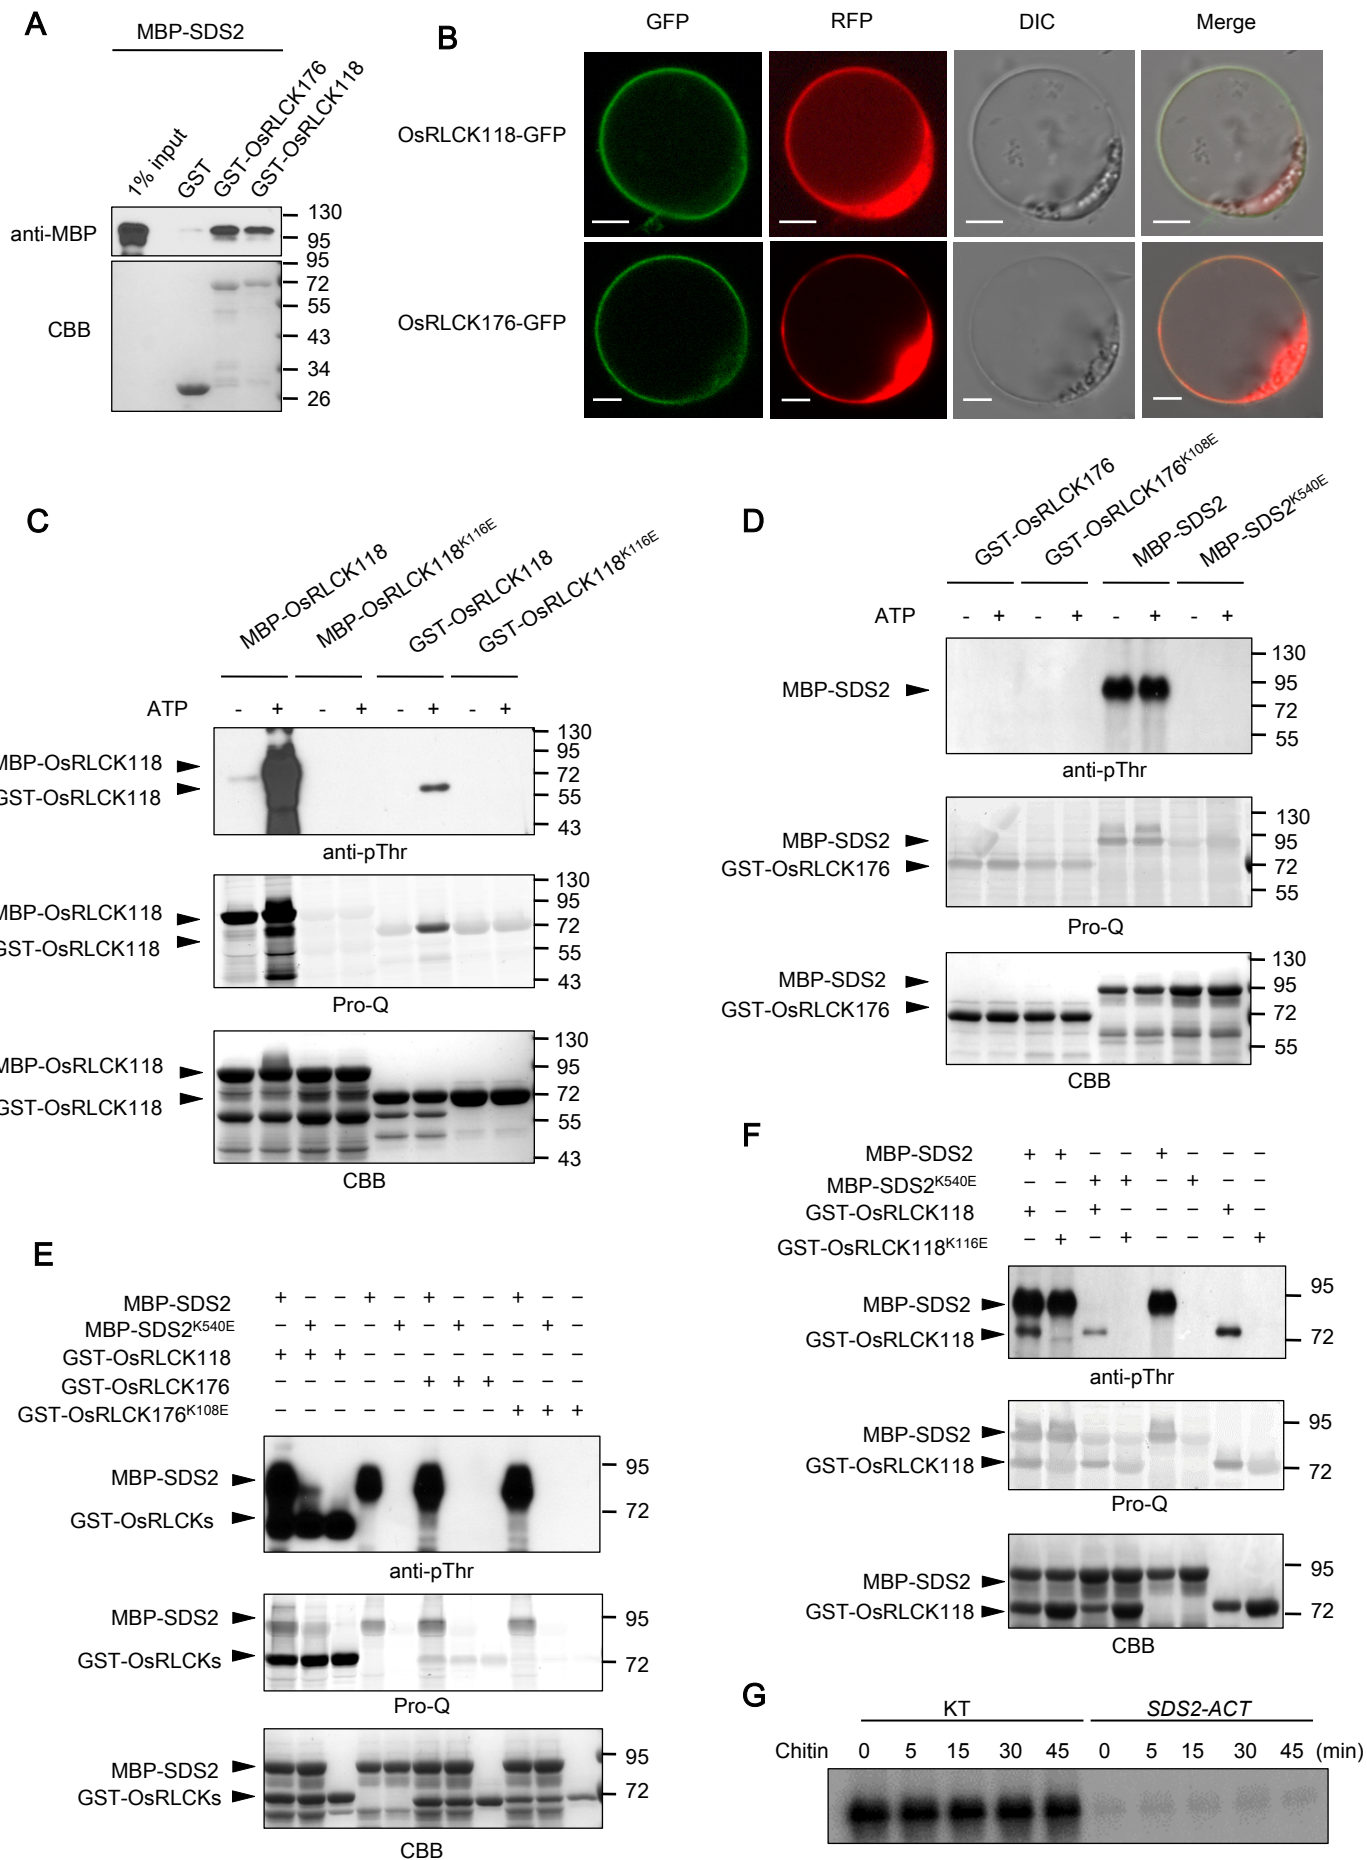



**Figure S5. Related to Figure 5: OsRLCK118 and OsRLCK176 are Genuine RLCKs and transphosphorylation between them and SDS2.** (A) Pull-down assay of the SDS2-OsRLCKs interaction. Baits: GST-OsRLCK176 and GST-OsRLCK118. Prey: MBP-SDS2. The prey was detected by immunoblotting (anti-MBP). Loading amount was detected by CBB staining. (B) Subcellular localization of OsRLCK118 and OsRLCK176. OsRLCK118-GFP and OsRLCK176-GFP were co-transfected with RFP into rice protoplasts. RFP was used as a cytoplasm marker. GFP, RFP, DIC and merge channels are labeled on the top of the pictures. Scale bars represent 10  $\mu$ m. Autophosphorylation assay of OsRLCK118 (C) and OsRLCK176 (D). OsRLCK118<sup>K116E</sup> and OsRLCK176<sup>K108E</sup> are kinase-inactive mutants. Purified proteins were applied to phosphorylation assays at the present (+) or absent (-) of 100 $\mu$ M ATP. Protein samples after reaction were separated on a SDS-PAGE gel and detected by immunoblot or Pro-Q staining to determine the phosphorylation level. CBB staining is used to determine loading control. A same gel was used for Pro-Q staining and CBB staining. Molecular markers are labeled on the right of the picture. Black triangles indicate target proteins. MBP-SDS2 is used as positive control in (A). This is the same experiment as in Figure 1F. (E) and (F) Transphosphorylation between SDS2 and OsRLCK118/176. GST-OsRLCK176, GST-OsRLCK176<sup>K108E</sup> (kinase-inactive) and GST-OsRLCK118 were combined with MBP-SDS2 or MBP-SDS2<sup>K540E</sup> to apply to the phosphorylation assay. Those proteins alone were used as an autophosphorylation control. (D) Transphosphorylation between SDS2 and GST-OsRLCK118 or GST-OsRLCK118<sup>K116E</sup> (kinase-inactive). Protein phosphorylation was detected by immunoblotting (anti-pThr) or staining (Pro-Q). CBB staining shows loading amounts. Pro-Q staining and CBB staining were performed with the same gel. – and + indicate absent or present of proteins labeled on the left. Molecular weights are labeled on right. Black triangles label specific protein. (G) Detection of OsRLCK118-HA *in vivo* phosphorylation in SDS2-ACT plants. Plasmids of OsRLCK118-HA are transfected into protoplasts of KT and SDS2-ACT plants separately. Transfected protoplasts are treated with 5 $\mu$ g/ml chitin for 0 min, 5min, 15min, 30min and 45min. Phosphorylation of OsRLCK118 is determined by band shift.



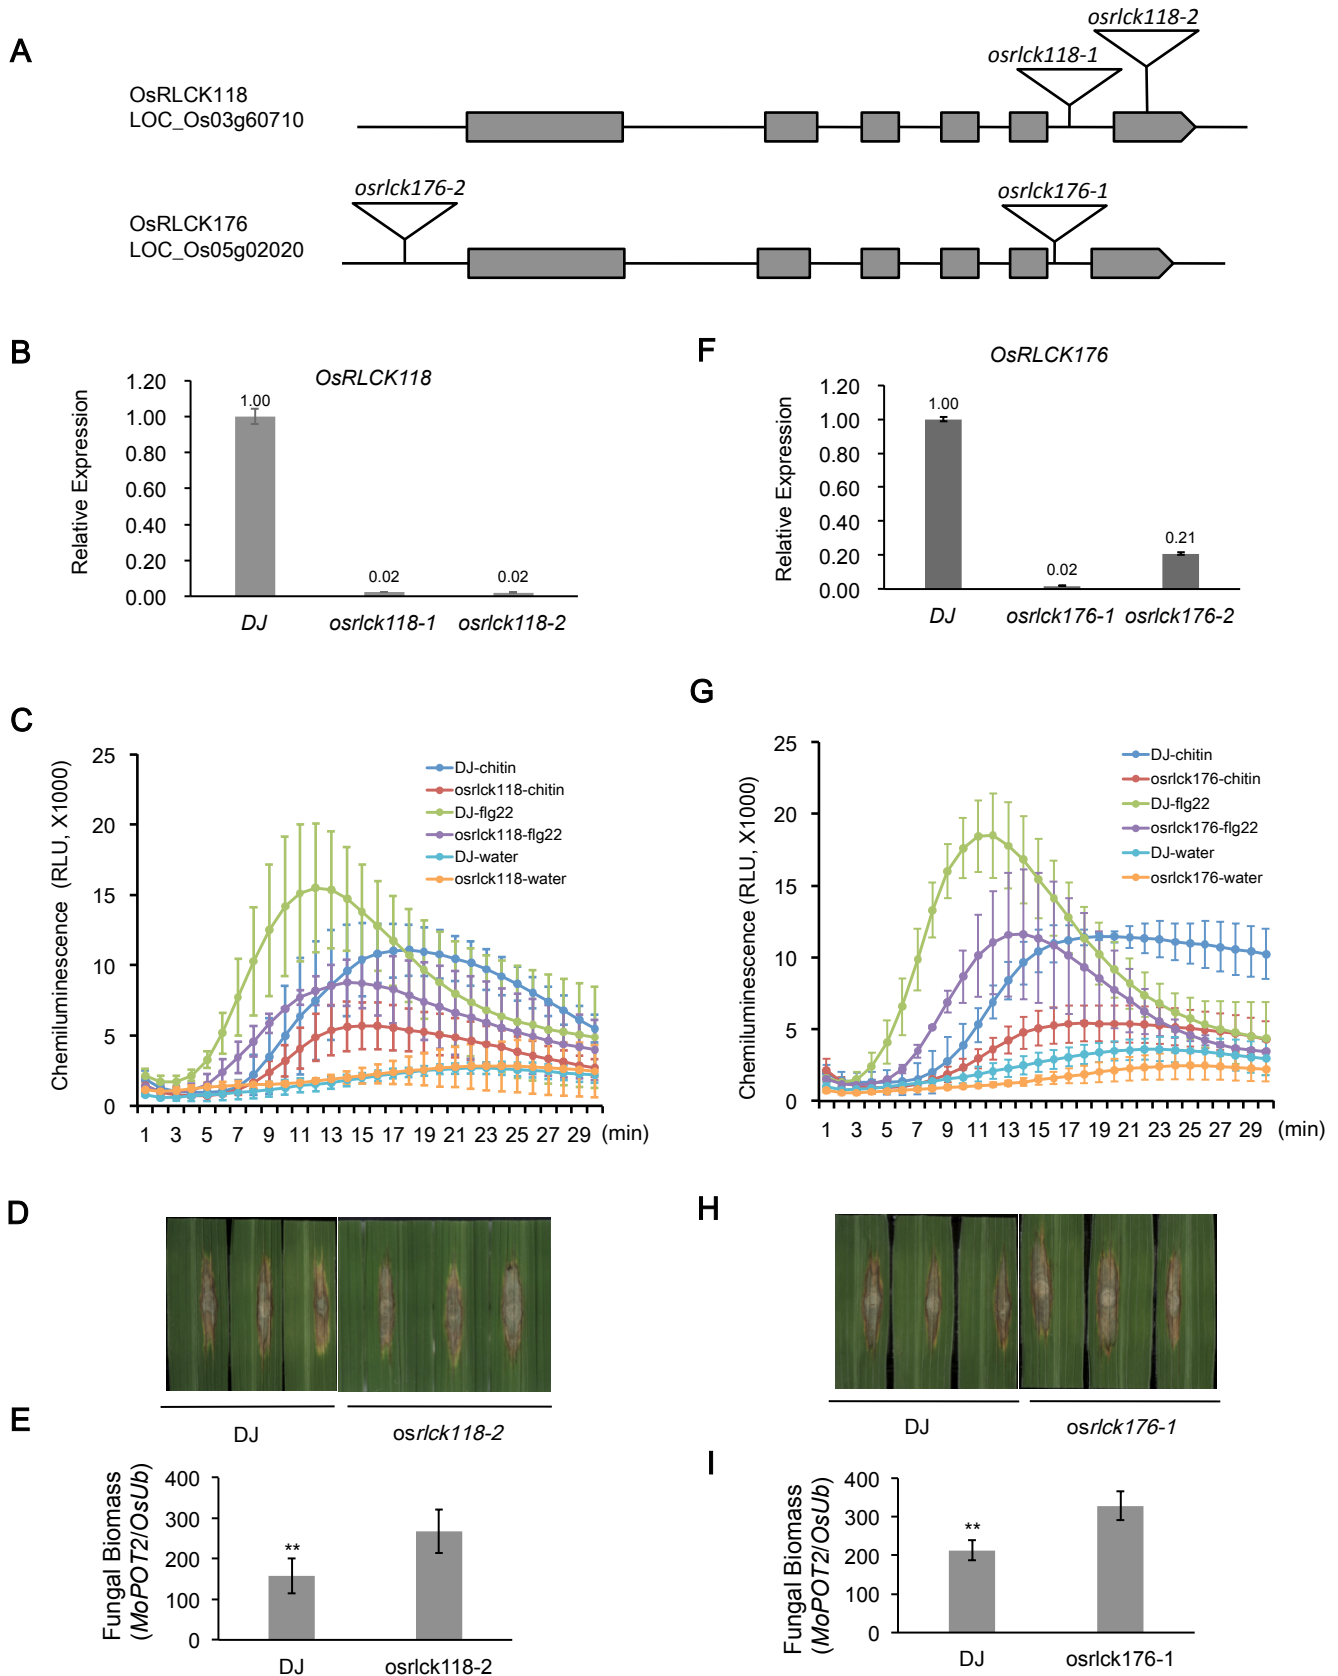

**Figure S6. Related to Figure 6: OsRLCK118/176 Positively Regulate Rice Immunity.** (A) Diagram of OsRLCK118 and OsRLCK176 gene structure and their T-DNA insertion mutants. Boxes and lines indicate exons and introns, respectively. Triangles indicate T-DNA insertions. (B) and (F) qRT-PCR analysis of OsRLCK118 and OsRLCK176 transcripts in the mutant lines. (C) and (G) ROS induction of *osrlck118* and *osrlck176* plants upon 10 $\mu$ g/ml chitin and 100 $\mu$ M flg22 treatments. Values are means  $\pm$  SD, n = 3 (technological repeats). These assays are replicated twice with similar results. (D) and (H) Punch inoculation of *osrlck176* and *osrlck118* plants with blast isolate RO1-1 at 9 dpi. (E) and (I) Quantification of fungal biomass of inoculated leaves in (D) and (H). Values are means  $\pm$  SD, n = 3 (technological repeats). Inoculations are replicated twice with similar results. Asterisks represent significant difference determined by Student's *t* test (\*\* p < 0.01).

**A**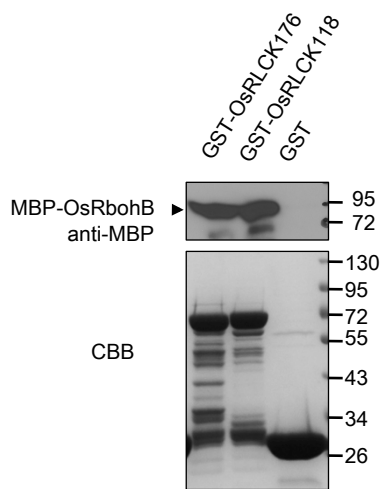**B**

MADLEAGMVA AATDQGNSTRSQDDAATLIPNSG  
 NLGSSNRSTK*T*ARFKDDDELVEITLDVQRD*S*VAIQ  
 EVRGVDEGGSGHG*T*GFDGLPLVSP*S*SKSGKLTS  
 KLRQVTNGLKMKSSSRKAPSPQAQQSAKRVKR  
 LDRTKSSAAVALKGLQFV*T*AKVGN DGWAAVEKR  
 FNQLQVDGVL*L*RSRFGK*C*IGMDG*S*DEFVQMF*D*  
 SLARKR*G*IVKQVLT*K*DELKDFYEQLT*D*QGF*D*NRL  
 RTFFDMVDKNADGRLTAEVKEIIALSASANKL*S*K  
 IKERADEYTALIMEELDPTNLGYIEMEDLEALLLQ*S*  
 PSEAAARSTTTHSSKLSKALSMK*L*ASNKEMSPVR  
 HYWQQFMYFLEENWKRSWVMT

**Figure S7. Related to Figure 7: OsRbohB interacts with OsRLCK118/ and OsRLCK176 and identification of OsRbohB phosphorylation sites.** (A) Pull-down assay of the OsRLCK118/176-OsRbohB interactions. Baits: GST-OsRLCK176 and GST-OsRLCK118. Prey: MBP-OsRbohB-N (N terminal1-355aa). The prey was detected by immunoblotting (anti-MBP). CBB staining shows loading amounts of the baits. (B) Mass spectrum (MS) analysis of GST-OsRbohB (N-terminus) phosphorylation by MBP-OsRLCK118. MS coverage is 80.56%. Red and black sequences indicate covered and uncovered peptides in the MS data. Green italic letter highlights the detected phosphorylation sites.

**Table S1. Related to Figure 1: Candidate Genes in the 28kb Interval**

| Candidate Genes | Annotation                                                                                          | Mutation       |
|-----------------|-----------------------------------------------------------------------------------------------------|----------------|
| LOC_Os01g57460  | Frataxin                                                                                            | No             |
| LOC_Os01g57470  | EF hand family protein                                                                              | No             |
| LOC_Os01g57480  | serine/threonine-protein kinase, SD-1 receptor like kinase                                          | G/A transition |
| LOC_Os01g57490  | D-mannose binding lectin family protein, serine/threonine-protein kinase, SD-1 receptor like kinase | No             |
| LOC_Os01g57500  | Expressed protein                                                                                   | No             |
| LOC_Os01g57510  | receptor protein kinase, SD-1 receptor like kinase                                                  | No             |

**Table S2. Related to Key Resource Table: Primers Used in This Study,**

| Primers name    | Sequence (5'-3')          | Purpose           |
|-----------------|---------------------------|-------------------|
| SDS2-qRT-F      | CCACTATGAGCGATGTCATCTC    |                   |
| SDS2-qRT-R      | CATCATGGGCATCCATTTTCGGCTG | Quantative RT-PCR |
| SDS2-RT-F       | GCAGGATATTGCTGTCAAGAGGCT  |                   |
| SDS2-RT-R       | GCAGGCTGCCTAGGATCAGGT     | SDS2 variants     |
| OsRLCK118-qRT-F | CACCGAGAATGGTTGGCAGA      |                   |
| OsRLCK118-qRT-R | TGCGAACCTCTCCTAAACAGA     | Quantative RT-PCR |
| OsRLCK176-qRT-F | AAAGGGCTCGCATTCTCCA       |                   |
| OsRLCK176-qRT-R | CTCTTGTCACCAGTCGGTCC      | Quantative RT-PCR |
| OsPAL1-qRT-F    | CTACAACAACGGGCTGACCT      |                   |
| OsPAL1-qRT-R    | TCTGGACATGGTTGGTGATG      | Quantative RT-PCR |
| OsPR5-qRT-F     | CAACAGCAACTACCAAGTCGTCTT  |                   |
| OsPR5-qRT-R     | CAAGGTGTCGTTTTATTTCATCAAC | Quantative RT-PCR |
| OsUb-qRT-F      | AACCAGCTGAGGCCCAAGA       |                   |
| OsUb-qRT-R      | CGATTGATTTAACCAGTCCATG    | Quantative RT-PCR |

---

|          |                          |                |
|----------|--------------------------|----------------|
| MoPOT2-F | ACGACCCGTCTTTACTTATTTGG  |                |
| MoPOT2-R | AAGTAGCGTTGGTTTTGTTGGAT  | Fungal biomass |
| OsUb-F   | TTCTGGTCCTTCCACTTTCAG    |                |
| OsUb-R   | ACGATTGATTTAACCAGTCCATGA | Fungal biomass |

---
